# Supplementary material for: Coupling Biocompatible Au Nanoclusters and Cellulose Nanofibrils to Prepare the Antibacterial Nanocomposite Films
Source: PubMed Central journal article supplement (PMC7466770; doi:10.3389/fbioe.2020.00986), 2020-08-18
Supplement: Image_1.pdf [file Image_1.pdf]

*Supplementary Material*

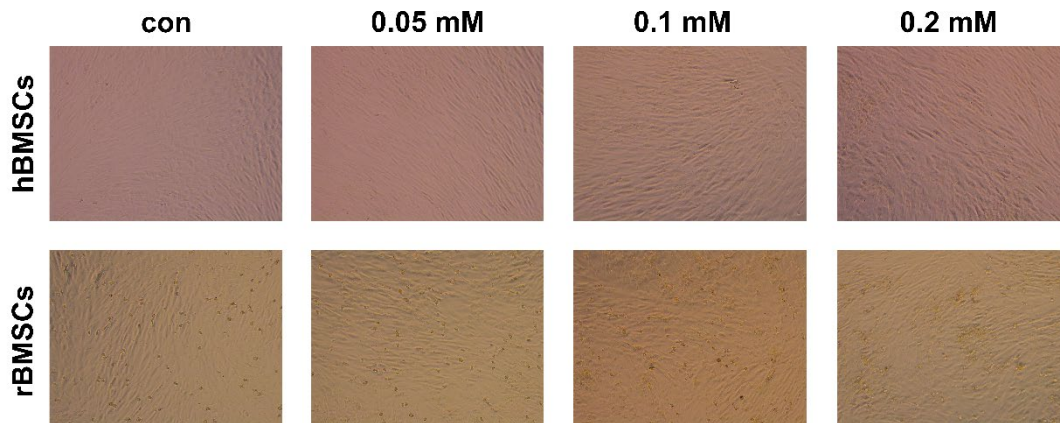

**Supplementary Figure S1.** Photographs of hBMSCs and rBMSCs treated with AuNCs with concentration of 0.05 mM, 0.1 mM and 0.2 mM respectively.

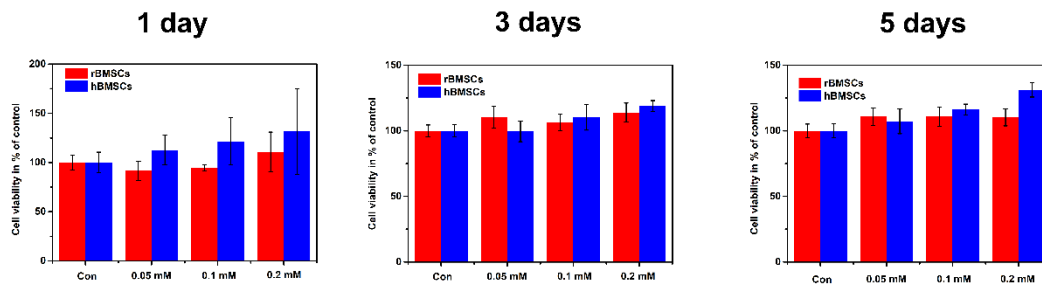

**Supplementary Figure S2.** Cell viability of rBMSCs and hBMSCs cells after incubated with AuNCs for 1, 3 and 5 days respectively.

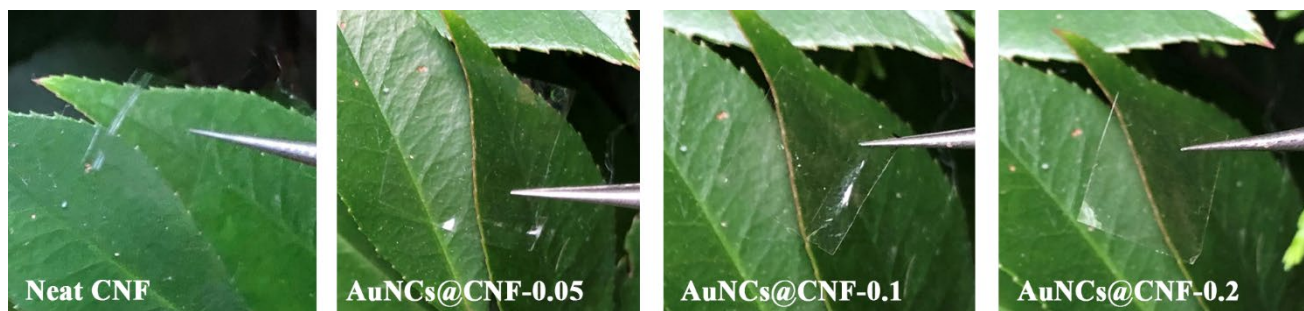

**Supplementary Figure S3.** Photograph of as-prepared neat CNF film, AuNCs@CNF-0.05, AuNCs@CNF-0.1 and AuNCs@CNF-0.2 respectively.

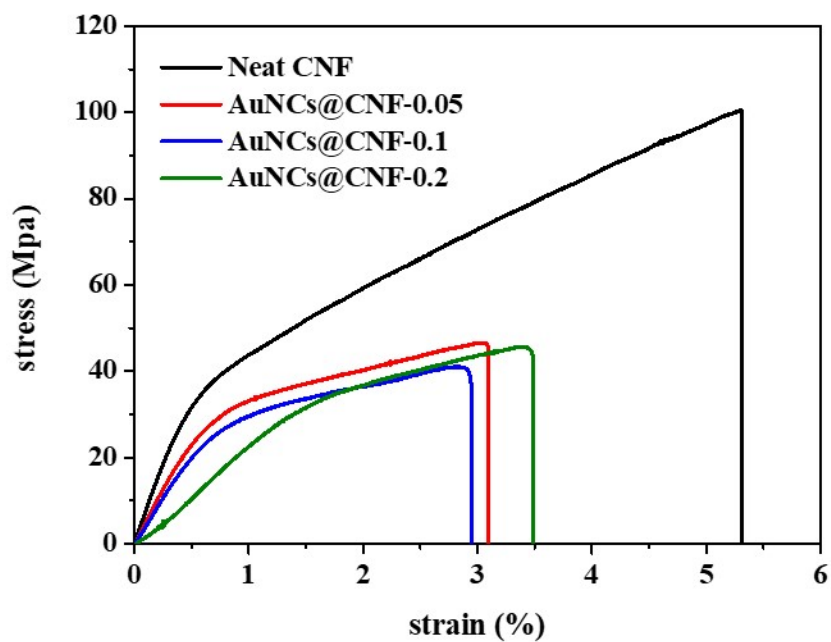

**Supplementary Figure S4.** Stress-strain curves of the prepared films

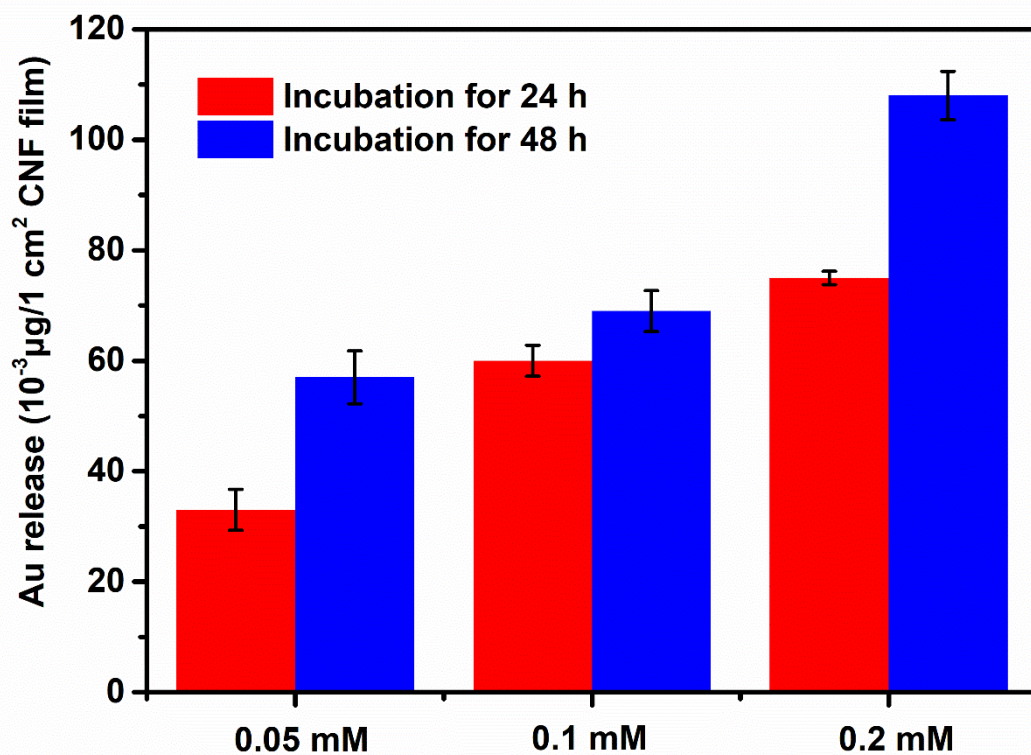

**Supplementary Figure S5.** AuNCs release from AuNCs@CNF films by incubating with PBS buffer at 37°C for 24 and 48 h

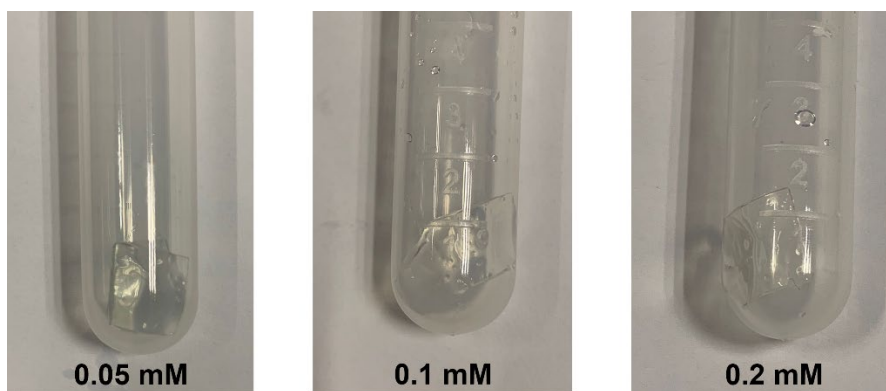

**Supplementary Figure S6.** Photographs of AuNCs@CNF-0.05, AuNCs@CNF-0.1 and AuNCs@CNF-0.2 films after incubated with PBS buffer at 37°C for 48 h respectively.
